# Supplementary material for: Shape spectra of elastic shells with surface-adsorbed semiflexible polymers
Source: Royal Society of Chemistry journal article supplement (doi:10.1039/d5sm00899a), 2025-12-01
Supplement: d5sm00899a1.pdf [file d5sm00899a1.pdf]

Supplementary Information for:  
**Shape spectra of elastic shells with  
surface-adsorbed semiflexible polymers**

Hadiya Abdul Hameed<sup>1</sup>, Jaroslaw Paturej<sup>2</sup>, and Aykut Erbas<sup>1</sup>

<sup>1</sup>*UNAM – National Nanotechnology Research Center and Institute of  
Materials Science and Nanotechnology, Bilkent University, Ankara 06800,  
Turkey*

<sup>2</sup>*Institute of Physics, University of Silesia at Katowice, Chorzów 41-500,  
Poland*

# 1 Concentration of semiflexible chains, $c$

The concentration,  $c$ , of coarse-grained semiflexible chains inside the elastic shell is varied by changing the number of chains,  $N$ , within the elastic shell.

The absolute concentration,  $c$  in  $\sigma^{-3}$ , is calculated as

$$c = \frac{NN_{\text{sf}}}{V} \quad (1)$$

where  $N_{\text{sf}}$  is the number of monomers per chain.

We also denote chain concentration in terms of bulk overlap concentration,  $c^*$

$$c^* = \frac{N_{\text{sf}}}{v} \quad (2)$$

where  $v \approx l\sigma^3$  is the pervaded volume of each chain.

For  $N_{\text{sf}} = 8$ , the overlap concentration is as follows

$$c^* = \frac{8}{\frac{4}{3}\pi(4\sigma)^3} = 0.02984155183 \approx 0.03\sigma^{-3} \quad (3)$$

$$\text{where } N_{\text{sf}} = 8, \quad v = \frac{4}{3}\pi r^3, \quad r = \frac{8\sigma}{2} = 4\sigma$$

The concentrations probed for short chains (i.e.,  $l/R = 8/34 \approx 0.25$ ) are shown in Table [S1](#). These correspond to the concentration range,  $0.3c^* \leq c \leq 4.8c^*$ .

Table S1: Number of semiflexible polymers,  $N$ , and concentrations,  $c$ , for  $N_{\text{sf}} = 8$ .

| $N$  | $c(\sigma^{-3})$ | $c/c^*$ |
|------|------------------|---------|
| 250  | 0.01             | 0.3     |
| 750  | 0.03             | 1.0     |
| 1250 | 0.06             | 2.0     |
| 2000 | 0.097            | 3.3     |
| 3000 | 0.15             | 4.8     |

Since the pervaded volume of the chain,  $v$ , increases with decreasing chain length,  $l = N_{\text{sf}}\sigma$ , the overlap concentration,  $c^*$ , decreases. For example, for  $N_{\text{sf}} = 32$ , the overlap concentration is

$$c^* = \frac{32}{\frac{4}{3}\pi(16\sigma)^3} \approx 0.002\sigma^{-3} \quad (4)$$

$$\text{where } N_{\text{rod}} = 32, \quad v = \frac{4}{3}\pi r^3, \quad r = \frac{32\sigma}{2} = 16\sigma$$

The overlap concentrations, and respective absolute concentrations in terms of  $c^*$  for various  $l/R$  discussed in the main text are shown in Table [S2](#).

Table S2: Overlap concentrations, and normalized concentrations for various chain lengths, where  $R \approx 34\sigma$ .

| $N_{\text{sf}}$ | $l/R$ | $c^*$  | $c/c^*(c = 0.06\sigma^{-3})$ | $c/c^*(c = 0.1\sigma^{-3})$ |
|-----------------|-------|--------|------------------------------|-----------------------------|
| 8               | 0.25  | 0.03   | 2.0                          | 3.3                         |
| 16              | 0.5   | 0.007  | 8.0                          | 13.4                        |
| 24              | 0.7   | 0.003  | 18.1                         | 30.1                        |
| 32              | 1.0   | 0.002  | 32.2                         | 53.7                        |
| 48              | 1.4   | 0.0008 | 72.4                         | 120.6                       |
| 64              | 2.0   | 0.0005 | 128.7                        | 214.5                       |

**2 Normalized asphericity,  $A_{\text{norm}}$**  The normalized asphericity,  $A_{\text{norm}}$ , is a normalized version of asphericity,  $A$  (see main text).  $A$  is normalized as follows

$$A_{\text{norm}} = \frac{A}{R_g^2} = \frac{\lambda_1 - \frac{1}{2}(\lambda_2 + \lambda_3)}{R_g^2} \quad (5)$$

where  $\lambda_1$ ,  $\lambda_2$ , and  $\lambda_3$  are eigenvalues of the gyration tensor of the elastic shell,  $S$ , and  $R_g$  is the radius of gyration of the shell (see main text). Dividing by  $R_g^2$  makes  $A_{\text{norm}}$  dimensionless, meaning that it eliminates the effect of shell size on asphericity.

The parameter  $A_{\text{norm}}$  ranges from 0 to 1: it equals 0 for perfectly symmetric (e.g., spherical) shells and approaches 1 for highly distorted shapes. In our system,  $A_{\text{norm}}$  falls within the range  $0 < A_{\text{norm}} \leq 0.2$ , where  $A_{\text{norm}} \approx 0.2$  corresponds to  $A \geq 100$ .

### 3 Shape anisotropy, $\kappa$

The relative shape anisotropy,  $\kappa$ , is a dimensionless measure that captures both the symmetry and dimensionality of a shape<sup>1</sup>. It is defined as

$$\kappa = 1 - \frac{3(\lambda_1\lambda_2 + \lambda_2\lambda_3 + \lambda_3\lambda_1)}{(\lambda_1 + \lambda_2 + \lambda_3)^2} \quad (6)$$

where  $\lambda_1$ ,  $\lambda_2$ , and  $\lambda_3$  are eigenvalues of the gyration tensor of the elastic shell,  $S$  (see main text).

The parameter  $\kappa$  ranges from 0 to 1: it equals 0 for perfectly symmetric (e.g., spherical) conformations and approaches 1 for elongated, linear structures. For planar symmetric configurations,  $\kappa$  typically converges to 1/4.

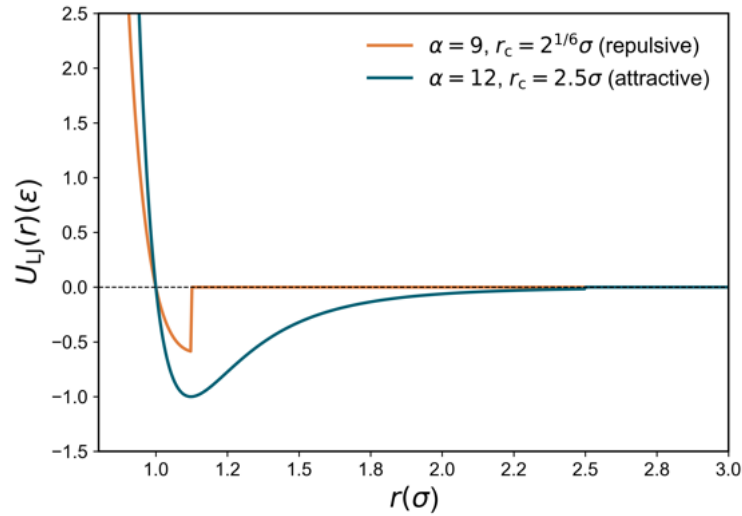

Figure S1: A shifted and truncated Lennard-Jones (LJ) potential describes all attractive and repulsive interactions (Eqn. 1 in main text). For repulsive flexible chains at the interior, we set the cutoff distance,  $r_c = 2^{1/6}\sigma$  and exponent  $\alpha = 9$  (orange curve). For attractive semiflexible chain-shell interactions,  $U_{RS}$ ,  $r_c = 2.5\sigma$  and exponent  $\alpha = 12$  (blue curve)

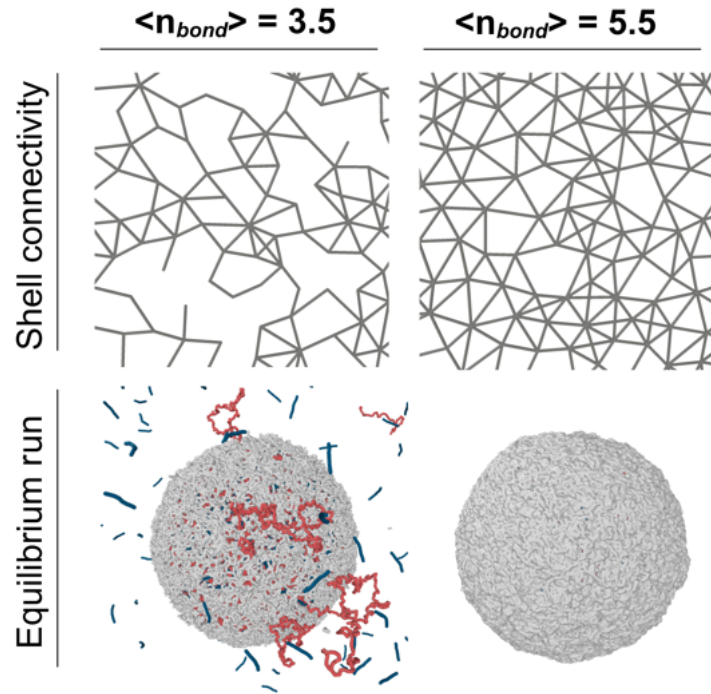

Figure S2: Decreasing shell connectivity to  $\langle n_{bond} \rangle = 3.5$  ( $\langle n_{bond} \rangle = 5.5$  in the main text) leads to the escape of shell contents during equilibrium run due to large mesh spaces.

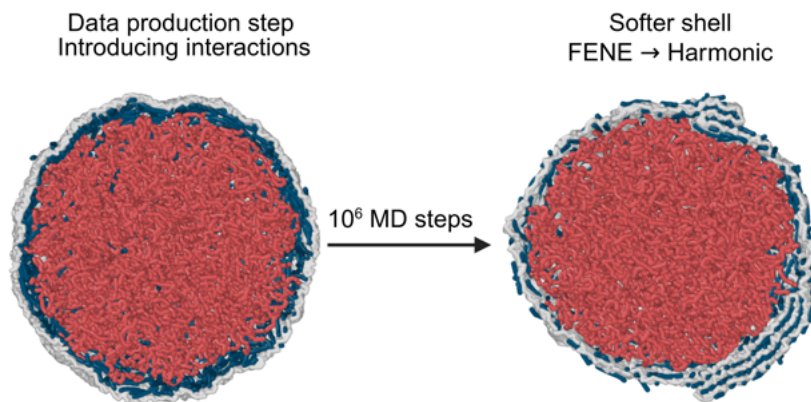

Figure S3: Replacing FENE bonds with harmonic springs to generate a softer shell configuration. These simulations are run for 10<sup>6</sup> MD time steps.

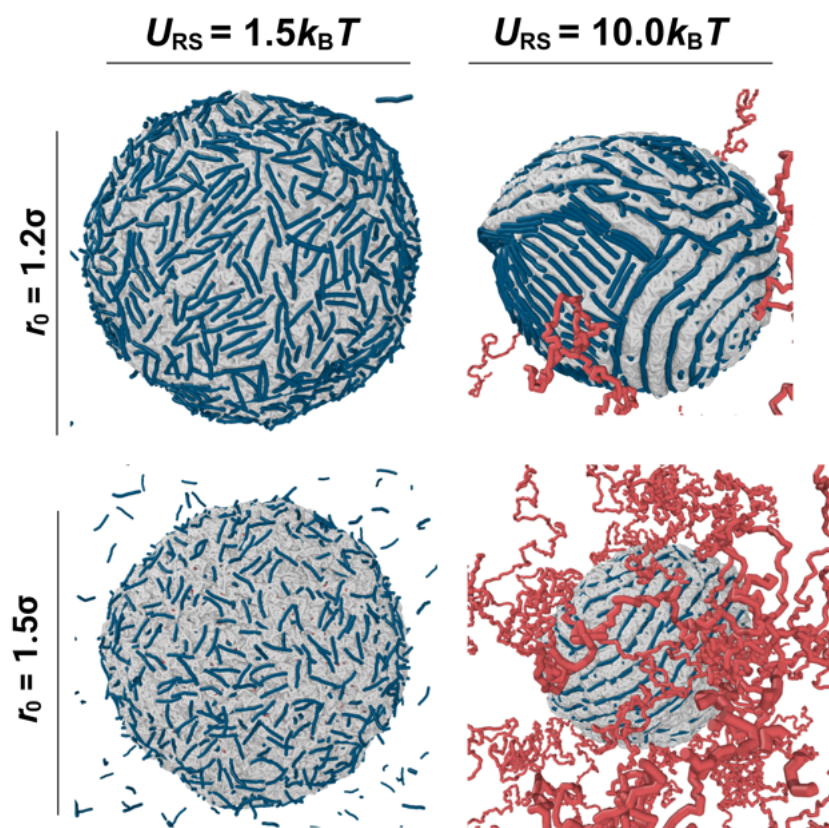

Figure S4: Reducing the cutoff distance,  $r_0$ , is required to prevent the escape of the shell contents to the exterior.



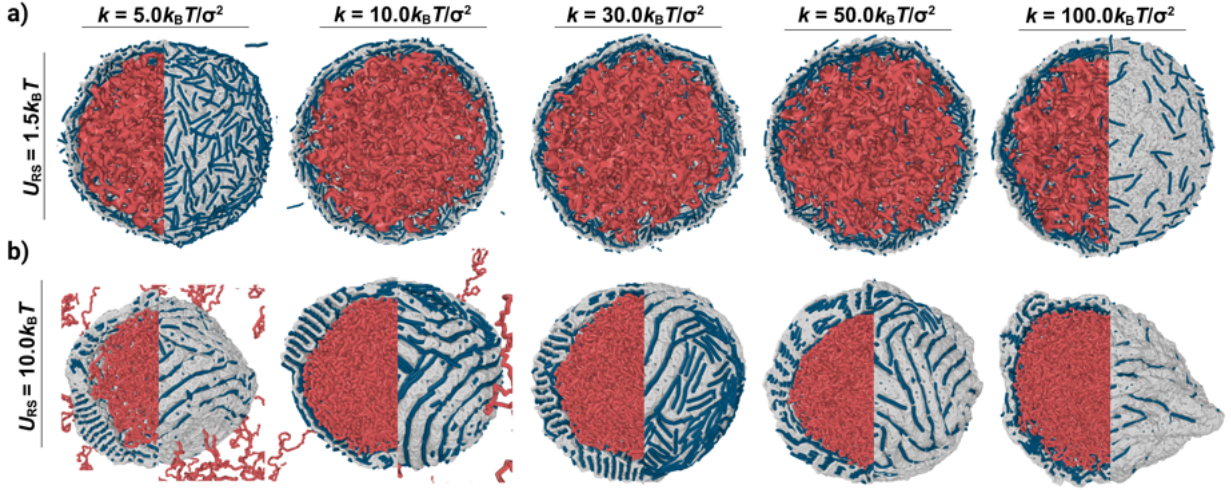

Figure S5: Effect of varying the **harmonic** shell stiffness parameter,  $k$ , over the range  $5.0k_B T/\sigma^2 \leq k \leq 100.0k_B T/\sigma^2$ , under **a)** weak and **b)** strong adsorption regimes.

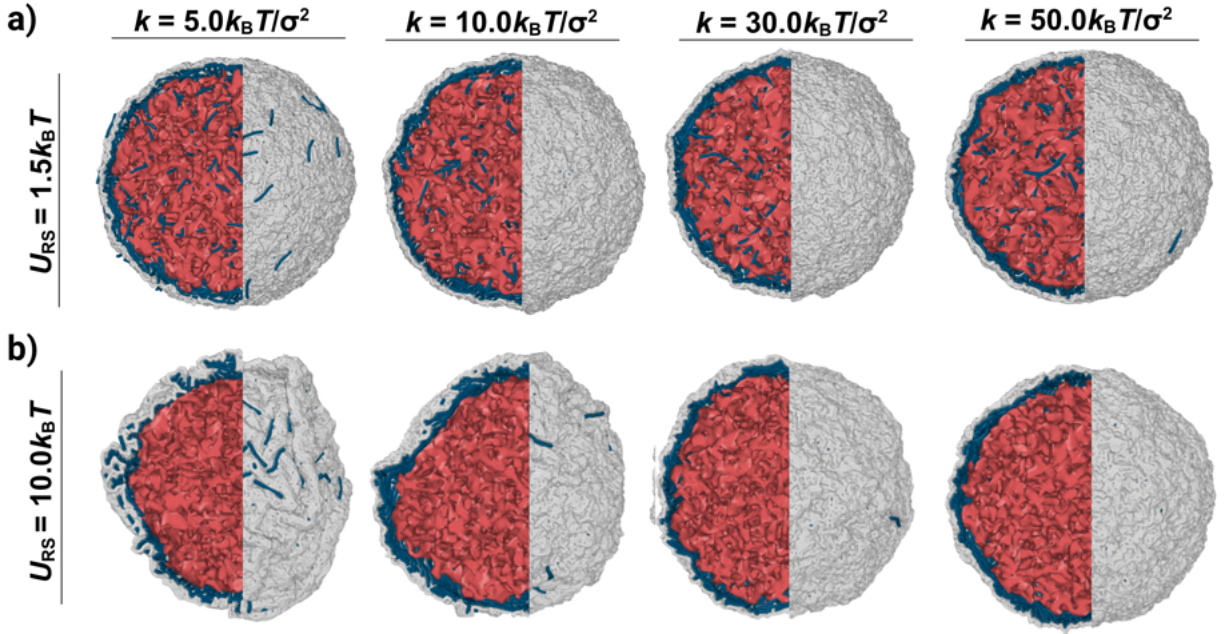

Figure S6: Effect of varying the **FENE** shell stiffness parameter,  $k$ , over the range  $5.0k_B T/\sigma^2 \leq k \leq 50.0k_B T/\sigma^2$ , under **a)** weak and **b)** strong adsorption regimes.

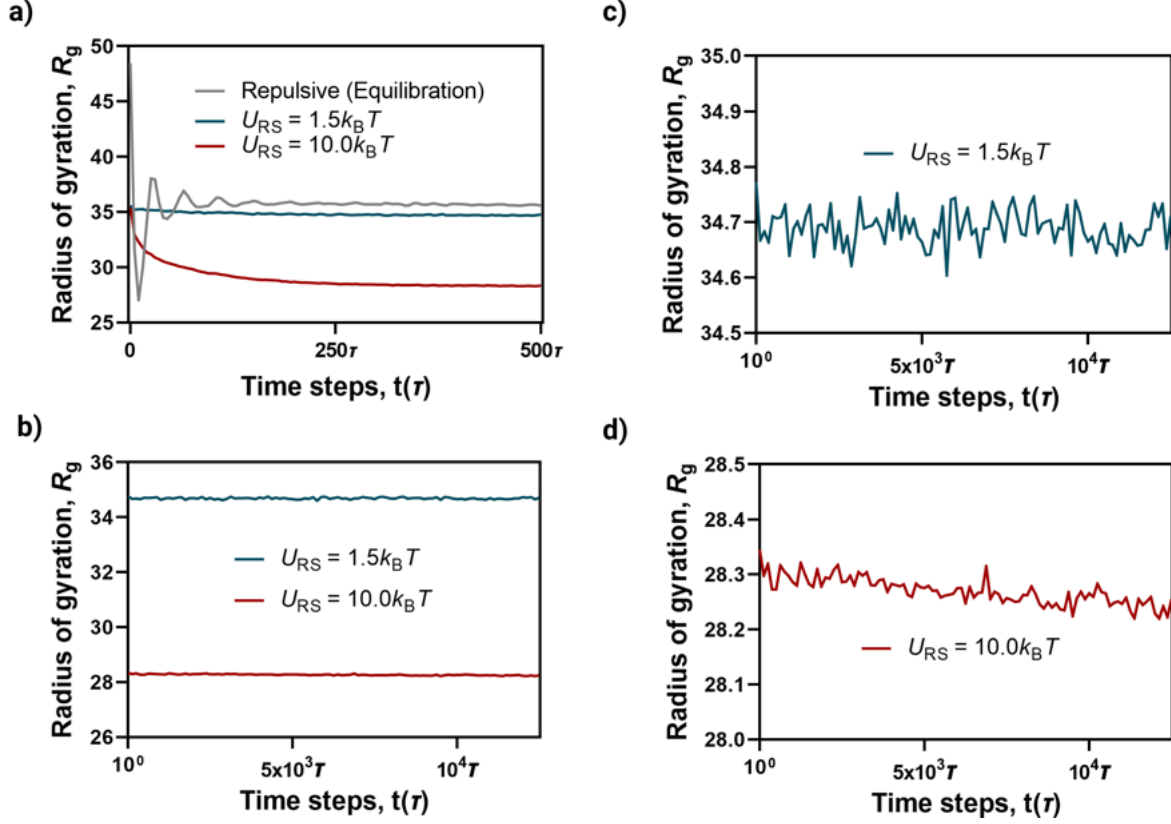

Figure S7: Radius of gyration of the shell ( $R_g$ ) fluctuates within  $\leq 0.25\sigma$  over simulation time for both equilibration and data production runs (see Fig. 1c), indicating quasi-equilibrium. **(a)**  $R_g$  as a function of simulation time for the equilibration step ( $500\tau$ ) and the first  $500\tau$  of data production runs for strong ( $U_{RS} = 10.0k_B T$ ) and weak ( $U_{RS} = 1.5k_B T$ ) adsorption. **(b)**  $R_g$  as a function of simulation time for the data production step ( $1.25 \times 10^4\tau$ ). Zoomed in graphs of  $R_g$  vs. time steps for **(c)** weak ( $U_{RS} = 1.5k_B T$ ) and **(d)** strong ( $U_{RS} = 10.0k_B T$ ) adsorption.



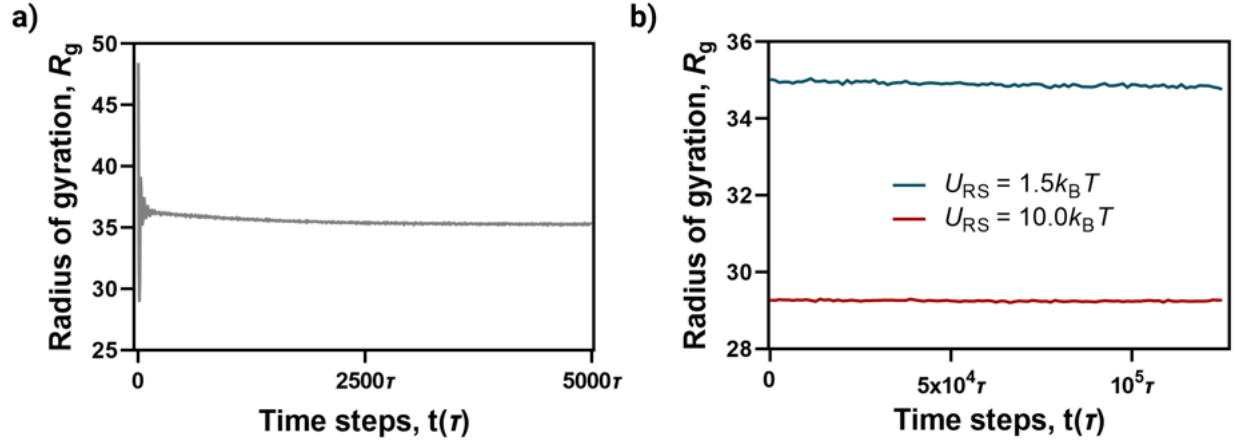

Figure S8: Radius of gyration of the shell ( $R_g$ ) fluctuates within  $\leq 0.25\sigma$  over longer simulation time, indicating our original simulation time is sufficient for equilibration. **a)**  $R_g$  as a function of simulation time for the equilibration step (5000 $\tau$ ). **(b)**  $R_g$  as a function of simulation time for the data production step ( $1.25 \times 10^5 \tau$ ).

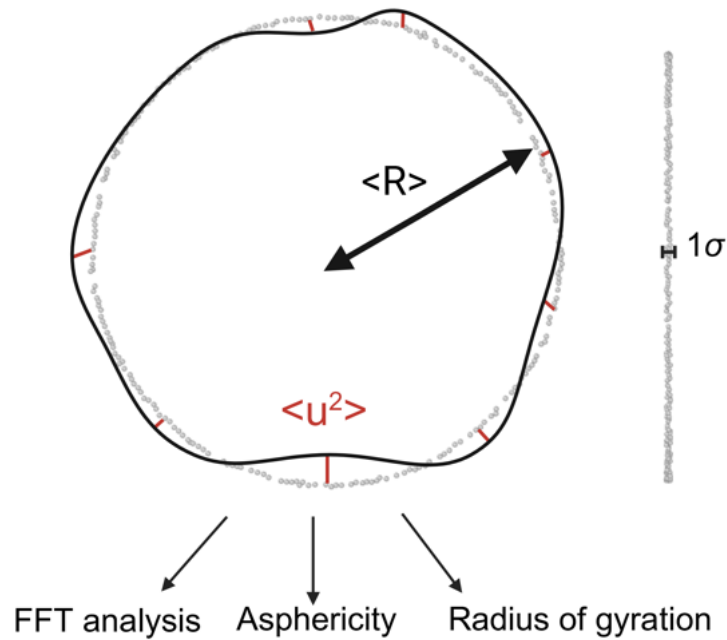

Figure S9: Analysis methods used to characterize shell shape anomalies in the main text.

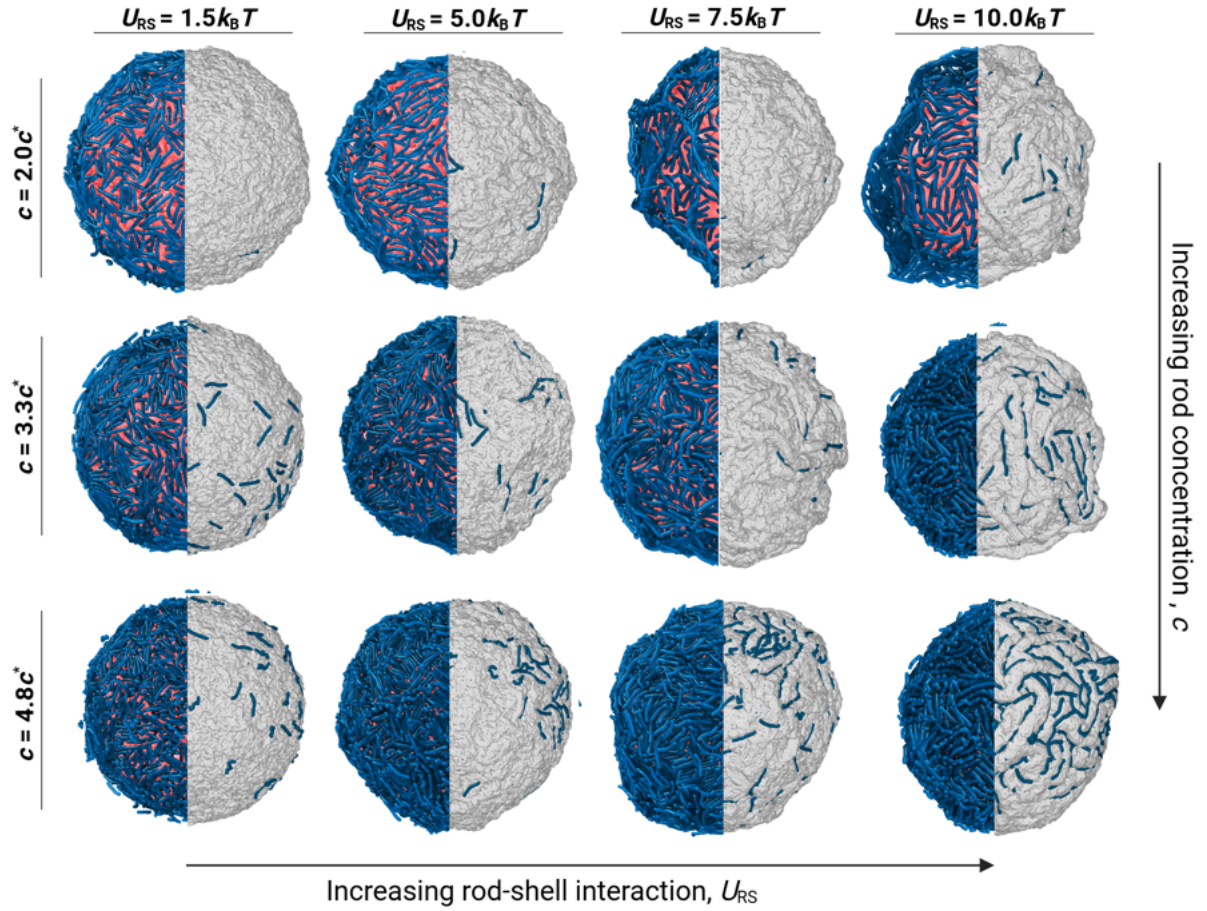

Figure S10: Exterior simulation snapshots, shell removed (right) and shell exterior (left), for various rod concentrations and  $U_{RS}$ . Shape distortions increase with increasing  $U_{RS}$  and above the overlap concentration,  $c > c^*$ .

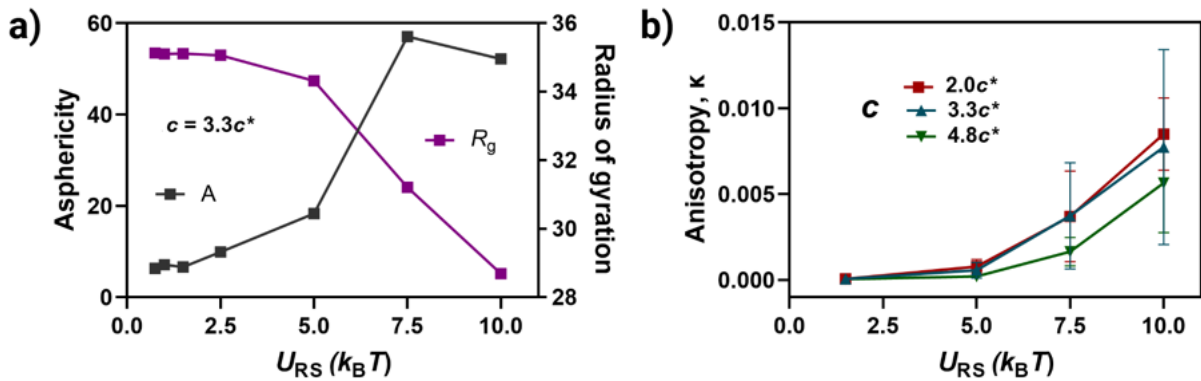

Figure S11: **a)** Radius of gyration decreases and asphericity increases with increasing rod-shell interaction strength,  $U_{RS}$ , at high rod concentration,  $c \approx 0.1\sigma^{-3}$ . **b)** Shape anisotropy increases as a function of  $U_{RS}$  with increasing chain concentration.

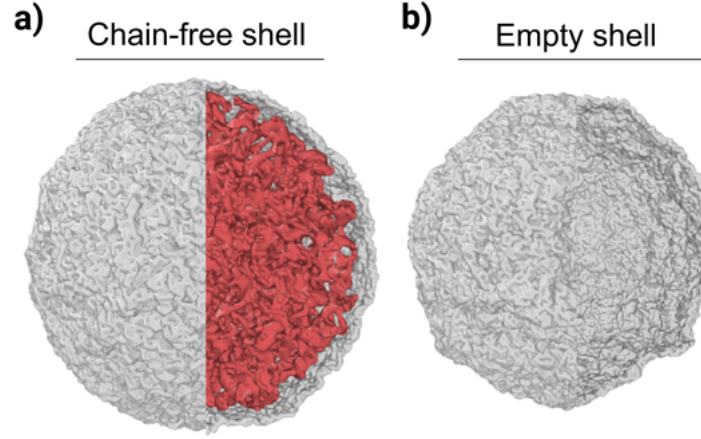

Figure S12: **a)** Two-component shell (i.e., without semiflexible chains) remains swollen (i.e.,  $R_g \approx 34\sigma$ ). **b)** Removing flexible polymer chains from the interior can also lead to crumpling and decreased size of the shell.

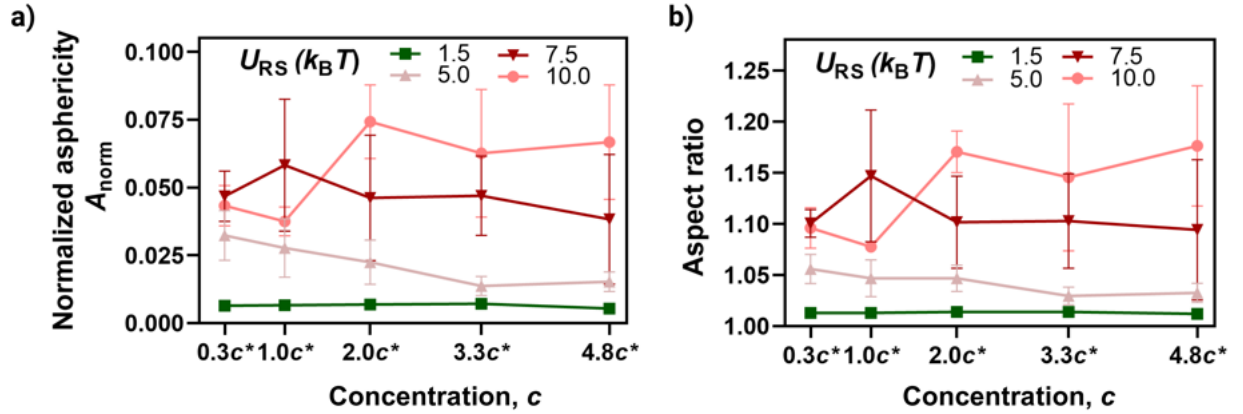

Figure S13: **a)** Normalized asphericity,  $A_{\text{norm}}$ , and **b)** aspect ratio as a function of semiflexible chain concentration,  $c$ .

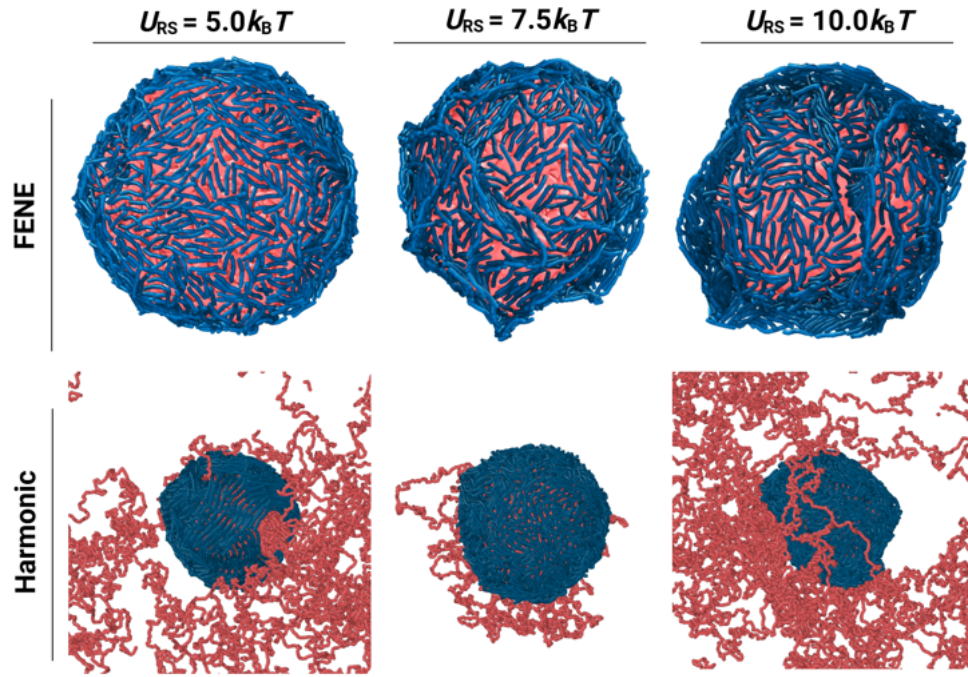

Figure S14: The elastic shell collapses inwards and polymer escapes under strong localization ( $U_{RS} = 5.0, 7.5$  and  $10.0k_B T$ ) when shell bonds are switched from FENE to extensible harmonic ones.

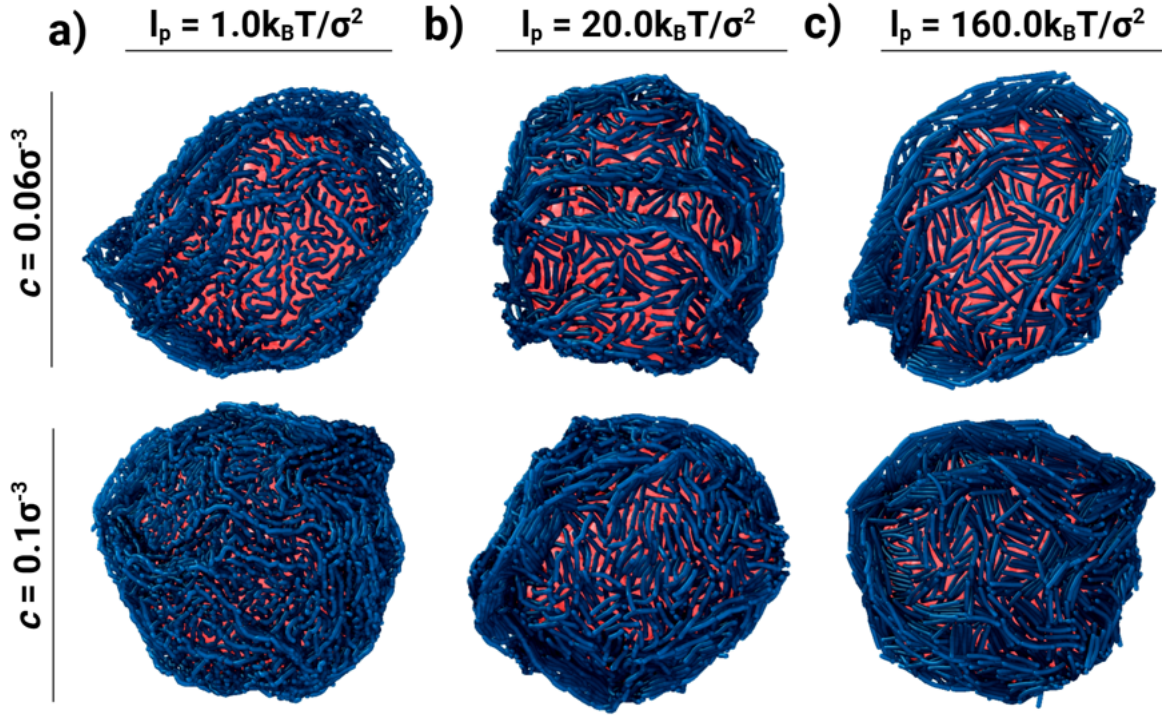

Figure S15: Distorted shapes under strong localization ( $U_{RS} = 10.0 k_B T$ ) are independent of the persistence of the chain,  $l_p$  at high concentrations,  $c > c^*$ .

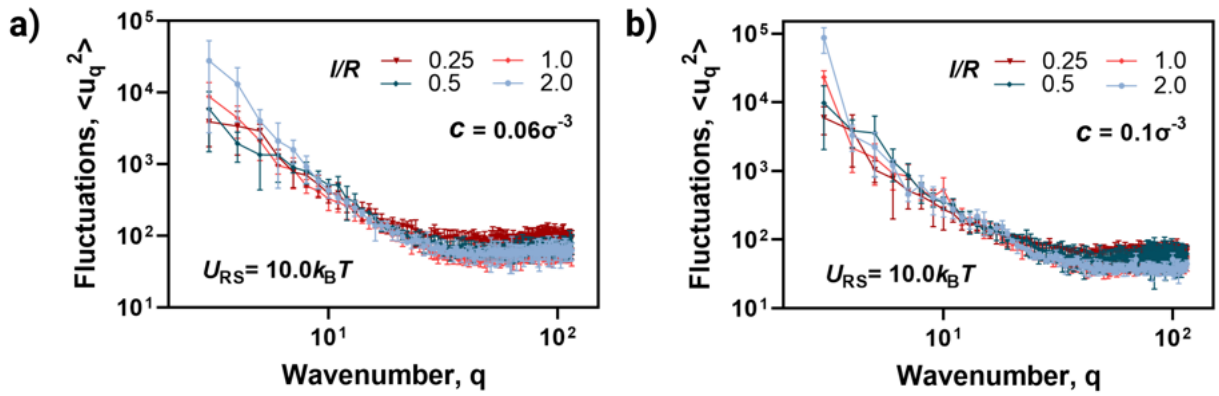

Figure S16: Fluctuation amplitudes do not vary significantly with increasing chain length,  $l/R$ , at high concentrations,  $c > c^*$ . Rod-shell attraction is also fixed to high,  $U_{RS} = 10.0 k_B T$ .



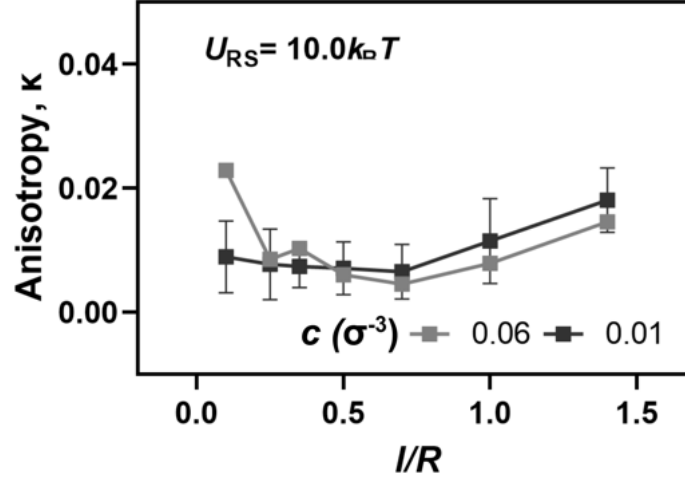

Figure S17: Anisotropy remains largely constant with increasing  $l/R$  under strong localization,  $U_{RS} = 10.0k_B T$ .

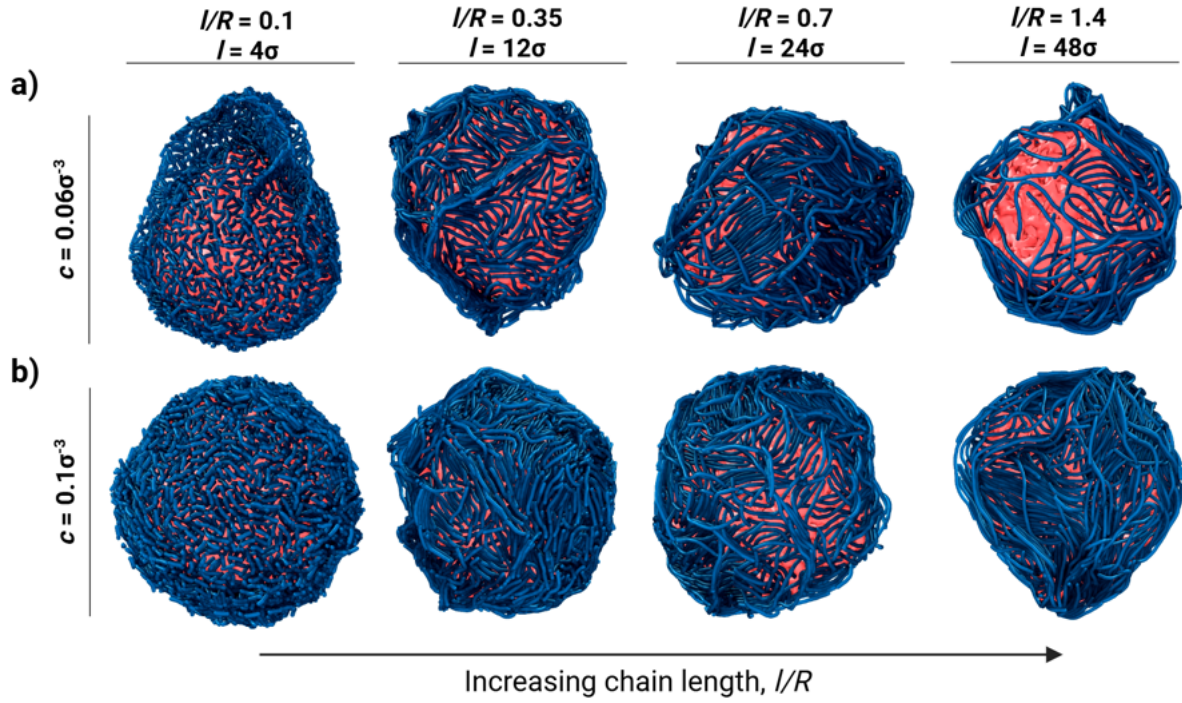

Figure S18: Simulation snapshots for distorted shell shapes at  $l/R = 0.1, 0.35, 0.7,$  and  $1.4$  under strong localization,  $U_{RS} = 10.0k_B T$ . High concentrations ( $c > c^*$ ) are chosen:  $c \approx$  **a)**  $0.06$  and **b)**  $0.1\sigma^{-3}$ .

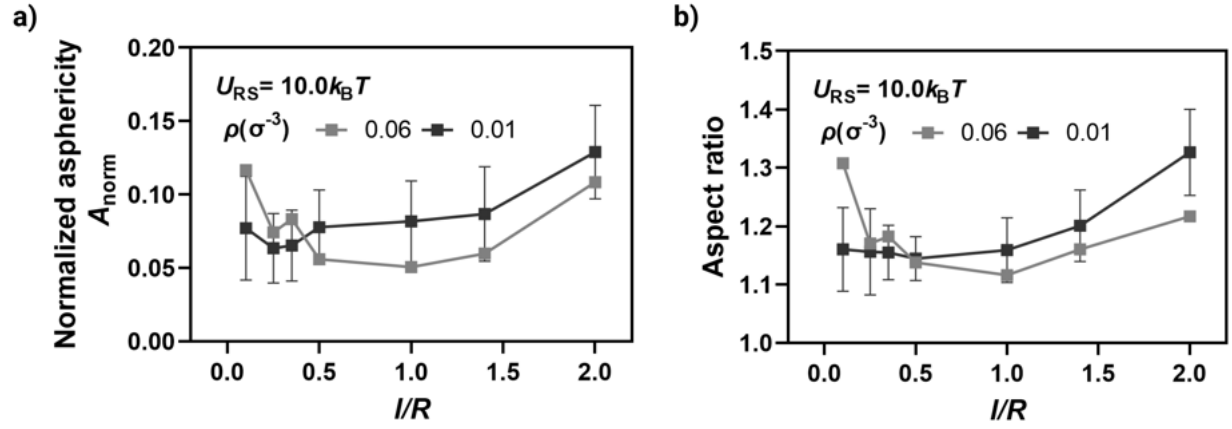

Figure S19: **a)** Normalized asphericity,  $A_{\text{norm}}$ , has larger error bars with increasing chain length,  $l/R$ . **b)** Aspect ratio exhibits slight increase with increasing  $l/R$  under strong localization,  $U_{\text{RS}} = 10.0 k_B T$ .

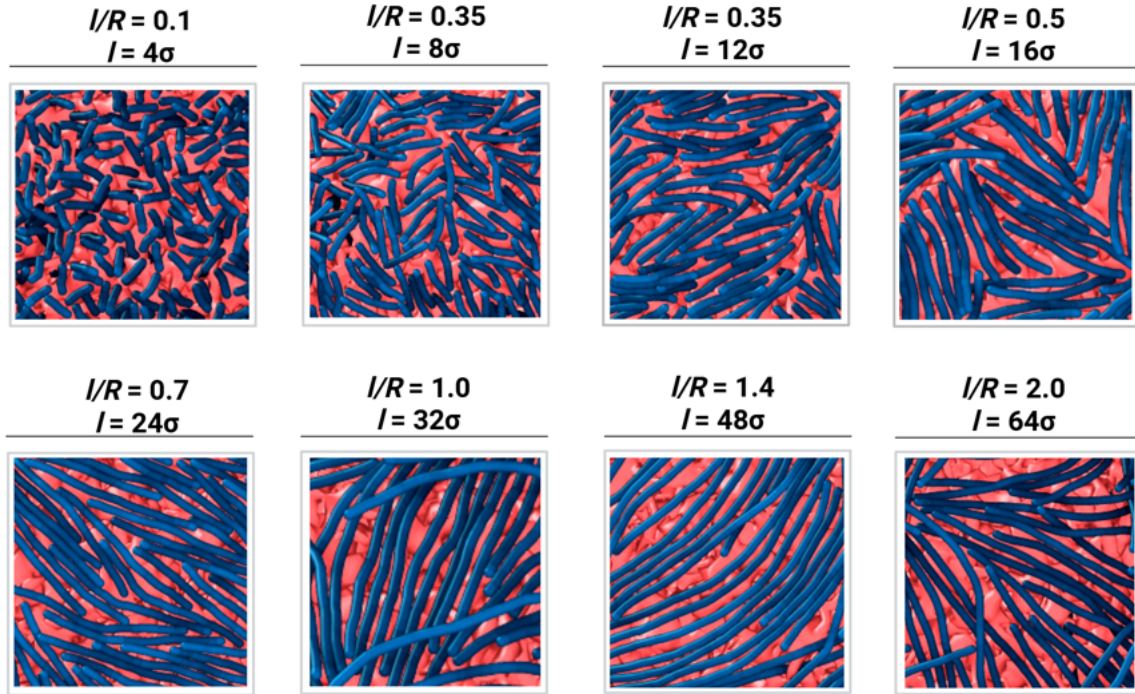

Figure S20: Organized domains emerge on the surface with increasing contour length-to-radius ratio,  $l/R$ , under weak localization,  $U_{\text{RS}} = 1.5 k_B T$ , even at lower absolute concentrations,  $c \approx 0.06 \sigma^{-3}$ . This also corresponds to  $c > c^*$ .



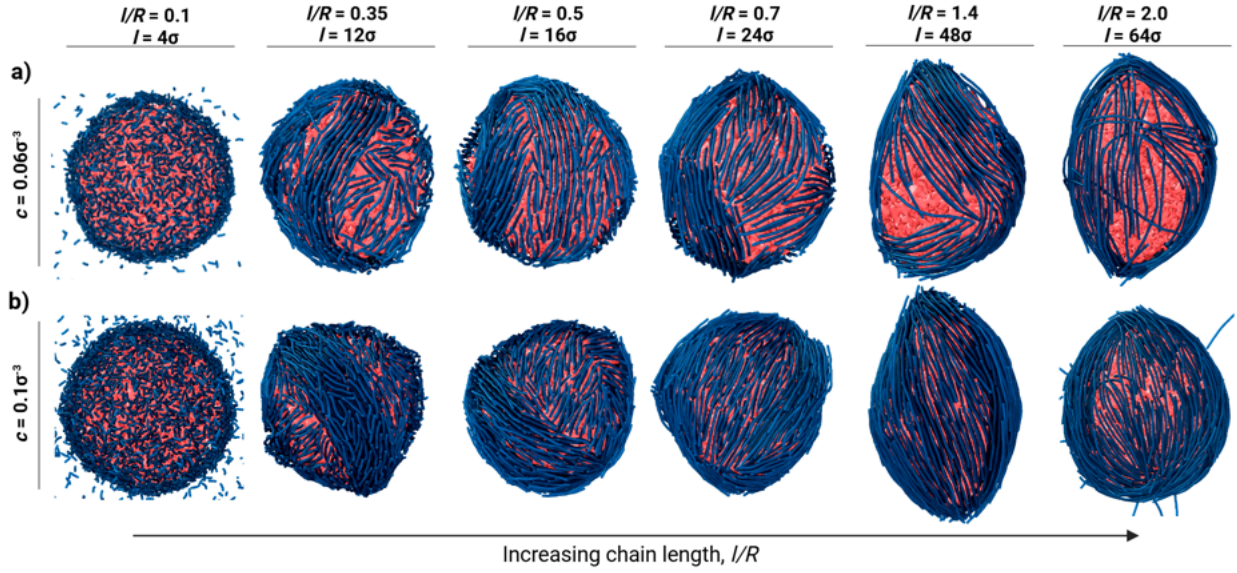

Figure S21: Shell elongates with increasing  $l/R$  under weak localization when shell bonds are switched from FENE to harmonic, irrespective of chain concentration (i.e.,  $c \approx$  **a)**  $0.06$  and **b)**  $0.1\sigma^{-3}$ ).

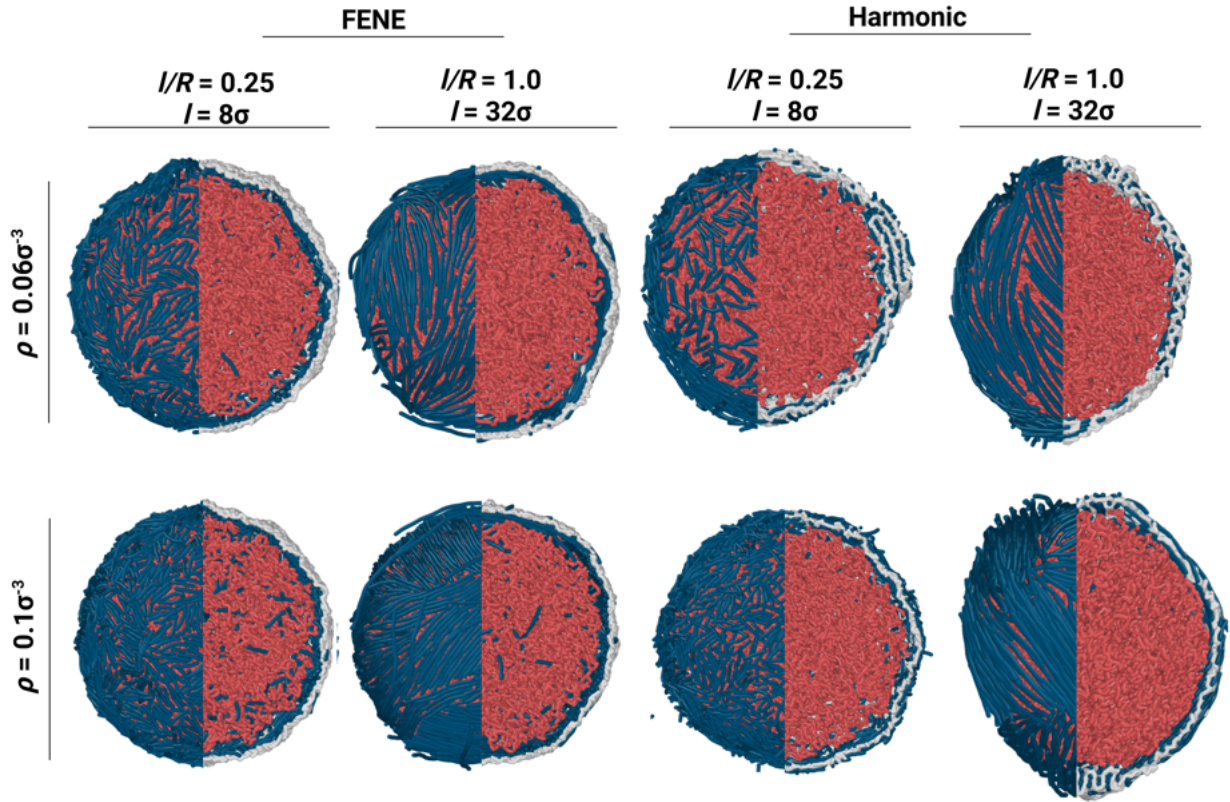

Figure S22: Exterior and interior cross-sections of the simulations discussed in Fig. 5 of the main text

## References

- [1] H. Arkin and W. Janke, *The Journal of Chemical Physics*, 2013, **138**,.
